# Supplementary material
Source: PubMed Central journal article supplement (PMC9748129)
Supplement: 41541_2022_590_MOESM1_ESM.pdf [file 41541_2022_590_MOESM1_ESM.pdf]

## Supplementary Materials

**Supplementary Table 1: Summary of Unsolicited Treatment Emergent Adverse Events According to Dose Cohort and Age Group**

| Cohort                                      | Single Dose              |                           |                           |                             |                                             |                             |                               | Two-Dose                  |                           |                                            |                           |                           |                                            |
|---------------------------------------------|--------------------------|---------------------------|---------------------------|-----------------------------|---------------------------------------------|-----------------------------|-------------------------------|---------------------------|---------------------------|--------------------------------------------|---------------------------|---------------------------|--------------------------------------------|
|                                             | Age 21 - 55              |                           |                           |                             |                                             | Age 56 - 80                 |                               | Age 21 - 55               |                           |                                            | Age 56 - 80               |                           |                                            |
|                                             | Cohort A<br>1µg<br>(N=5) | Cohort B<br>5µg<br>(N=10) | Cohort C<br>10µg<br>(N=5) | Cohort D1<br>7.5µg<br>(N=5) | Pooled Placebo Cohorts<br>A to D1<br>(N=10) | Cohort D2<br>7.5µg<br>(N=5) | Cohort D2<br>Placebo<br>(N=2) | Cohort E<br>5µg<br>(N=12) | Cohort F<br>3µg<br>(N=12) | Pooled Placebo Cohorts<br>E and F<br>(N=8) | Cohort G<br>5µg<br>(N=12) | Cohort H<br>3µg<br>(N=12) | Pooled Placebo Cohorts<br>G and H<br>(N=8) |
| Any Unsolicited Event                       | 4<br>(80.0)              | 7<br>(70.0)               | 5<br>(100.0)              | 4<br>(80.0)                 | 5<br>(50.0)                                 | 5<br>(100.0)                | 0                             | 8<br>(66.7)               | 8<br>(66.7)               | 6<br>(75.0)                                | 12<br>(100.0)             | 8<br>(66.7)               | 3<br>(37.5)                                |
| Related                                     | 4<br>(80.0)              | 6<br>(60.0)               | 5<br>(100.0)              | 3<br>(60.0)                 | 0                                           | 5<br>(100.0)                | 0                             | 7<br>(58.3%)              | 8<br>(66.7%)              | 1<br>(12.5%)                               | 9<br>(75.0%)              | 5<br>(41.7%)              | 1<br>(12.5%)                               |
| Severe                                      | 0                        | 0                         | 2<br>(40.0)               | 0                           | 0                                           | 0                           | 0                             | 0                         | 0                         | 0                                          | 0                         | 1<br>(8.3)                | 0                                          |
| Life threatening                            | 0                        | 0                         | 0                         | 0                           | 0                                           | 0                           | 0                             | 0                         | 0                         | 0                                          | 0                         | 0                         | 0                                          |
| Any Serious Unsolicited Event               | 0                        | 0                         | 0                         | 0                           | 1<br>(10.0)                                 | 0                           | 0                             | 0                         | 0                         | 0                                          | 0                         | 0                         | 0                                          |
| Related                                     | 0                        | 0                         | 0                         | 0                           | 0                                           | 0                           | 0                             | 0                         | 0                         | 0                                          | 0                         | 0                         | 0                                          |
| Severe                                      | 0                        | 0                         | 0                         | 0                           | 0                                           | 0                           | 0                             | 0                         | 0                         | 0                                          | 0                         | 0                         | 0                                          |
| Life-threatening                            | 0                        | 0                         | 0                         | 0                           | 0                                           | 0                           | 0                             | 0                         | 0                         | 0                                          | 0                         | 0                         | 0                                          |
| Any Unsolicited Event Leading to Withdrawal | 0                        | 0                         | 0                         | 0                           | 0                                           | 0                           | 0                             | 0                         | 0                         | 0                                          | 0                         | 0                         | 0                                          |
| Related                                     | 0                        | 0                         | 0                         | 0                           | 0                                           | 0                           | 0                             | 0                         | 0                         | 0                                          | 0                         | 0                         | 0                                          |
| Severe                                      | 0                        | 0                         | 0                         | 0                           | 0                                           | 0                           | 0                             | 0                         | 0                         | 0                                          | 0                         | 0                         | 0                                          |
| Life-threatening                            | 0                        | 0                         | 0                         | 0                           | 0                                           | 0                           | 0                             | 0                         | 0                         | 0                                          | 0                         | 0                         | 0                                          |
| Death                                       | 0                        | 0                         | 0                         | 0                           | 0                                           | 0                           | 0                             | 0                         | 0                         | 0                                          | 0                         | 0                         | 0                                          |

**Supplementary Table 2: Medically Attended Events by Dose Cohort and Age Group**

| Cohort            | Single Dose              |                           |                           |                             |                                                   |                             |                               | Two-Dose                  |                           |                                                  |                           |                           |                                                  |
|-------------------|--------------------------|---------------------------|---------------------------|-----------------------------|---------------------------------------------------|-----------------------------|-------------------------------|---------------------------|---------------------------|--------------------------------------------------|---------------------------|---------------------------|--------------------------------------------------|
|                   | Age 21 - 55              |                           |                           |                             |                                                   | Age 56 - 80                 |                               | Age 21 - 55               |                           |                                                  | Age 56 - 80               |                           |                                                  |
| Event Term / n(%) | Cohort A<br>1µg<br>(N=5) | Cohort B<br>5µg<br>(N=10) | Cohort C<br>10µg<br>(N=5) | Cohort D1<br>7.5µg<br>(N=5) | Pooled<br>Placebo<br>Cohorts<br>A to D1<br>(N=10) | Cohort D2<br>7.5µg<br>(N=5) | Cohort D2<br>Placebo<br>(N=2) | Cohort E<br>5µg<br>(N=12) | Cohort F<br>3µg<br>(N=12) | Pooled<br>Placebo<br>Cohorts<br>E and F<br>(N=8) | Cohort G<br>5µg<br>(N=12) | Cohort H<br>3µg<br>(N=12) | Pooled<br>Placebo<br>Cohorts<br>G and H<br>(N=8) |
| Cellulitis        | 0                        | 0                         | 0                         | 0                           | 1 (10.0)                                          | 0                           | 0                             | 0                         | 0                         | 0                                                | 0                         | 0                         | 0                                                |
| Skin laceration   | 0                        | 0                         | 0                         | 0                           | 0                                                 | 0                           | 0                             | 0                         | 1 (8.3)                   | 0                                                | 0                         | 0                         | 0                                                |
| Fever             | 0                        | 0                         | 0                         | 0                           | 0                                                 | 0                           | 0                             | 0                         | 0                         | 1 (12.5)                                         | 0                         | 0                         | 0                                                |
| Fatigue           | 0                        | 0                         | 0                         | 0                           | 0                                                 | 0                           | 0                             | 0                         | 0                         | 1 (12.5)                                         | 0                         | 0                         | 0                                                |
| Diarrhoea         | 0                        | 0                         | 0                         | 0                           | 0                                                 | 0                           | 0                             | 0                         | 0                         | 1 (12.5)                                         | 0                         | 0                         | 0                                                |
| Vomiting          | 0                        | 0                         | 0                         | 0                           | 0                                                 | 0                           | 0                             | 0                         | 0                         | 0                                                | 1 (8.3)                   | 0                         | 0                                                |
| Nausea            | 0                        | 0                         | 0                         | 0                           | 0                                                 | 0                           | 0                             | 0                         | 0                         | 0                                                | 0                         | 1 (8.3)                   | 0                                                |
| Dizziness         | 0                        | 0                         | 0                         | 0                           | 0                                                 | 0                           | 0                             | 0                         | 0                         | 0                                                | 1 (8.3)                   | 1 (8.3)                   | 0                                                |

**Supplementary Table 3: Grade Shifts in Alanine Transaminase and Aspartate Transaminase in ARCT-021 Treated Participants**

|          |        | ALT              |         |    |         |    |
|----------|--------|------------------|---------|----|---------|----|
|          |        | Post Vaccination |         |    |         |    |
|          |        | Normal           | G1      | G2 | G3      | G4 |
| Baseline | Normal | 72 (92.3)        | 4 (5.1) | 0  | 1 (1.3) | 0  |
|          | G1     | 0                | 1 (1.3) | 0  | 0       | 0  |
|          | G2     | 0                | 0       | 0  | 0       | 0  |
|          | G3     | 0                | 0       | 0  | 0       | 0  |
|          | G4     | 0                | 0       | 0  | 0       | 0  |

| AST              |         |         |    |    |
|------------------|---------|---------|----|----|
| Post Vaccination |         |         |    |    |
| Normal           | G1      | G2      | G3 | G4 |
| 75 (96.2)        | 2 (2.6) | 1 (1.3) | 0  | 0  |
| 0                | 0       | 0       | 0  | 0  |
| 0                | 0       | 0       | 0  | 0  |
| 0                | 0       | 0       | 0  | 0  |
| 0                | 0       | 0       | 0  | 0  |

**Supplementary Table 4: Total Number (%) of Events by Class of Event, Treatment Group and Severity – Safety Population**

| Event Category                | Number (%) of Events by Type and Severity |                      |                     |             |                   |                      |                    |            |
|-------------------------------|-------------------------------------------|----------------------|---------------------|-------------|-------------------|----------------------|--------------------|------------|
|                               | ARCT-021-01                               |                      |                     |             | Placebo           |                      |                    |            |
|                               | Grade 1/<br>Mild                          | Grade 2/<br>Moderate | Grade 3 /<br>Severe | Total       | Grade 1 /<br>Mild | Grade 2/<br>Moderate | Grade 3/<br>Severe | Total      |
| Any Event                     | 387 (78.2)                                | 91 (18.4)            | 17 (3.4)            | 495 (100.0) | 66 (88.0)         | 9 (12.0)             | 0                  | 75 (100.0) |
| Any Local Solicited Event     | 142 (28.7)                                | 16 (3.2)             | 1 (0.2)             | 159 (32.1)  | 9 (12.0)          | 0                    | 0                  | 9 (12.0)   |
| Any Systemic Solicited Event  | 152 (30.7)                                | 28 (5.7)             | 11 (2.2)            | 191 (38.6)  | 31 (41.3)         | 4 (5.3)              | 0                  | 35 (46.7)  |
| Any Unsolicited Adverse Event | 93 (18.8)                                 | 47 (9.5)             | 5 (1.0)             | 145 (29.3)  | 26 (34.7)         | 5 (6.7)              | 0                  | 31 (41.3)  |

**Supplementary Table 5. Antibody responses in 1-Dose Cohorts**

|                           | Age 21 – 55               |                                 |                            |                                  |                              |                                   |                              |                                   |                                                    |                              | Age 56 – 80                  |                                 |                             |                 |
|---------------------------|---------------------------|---------------------------------|----------------------------|----------------------------------|------------------------------|-----------------------------------|------------------------------|-----------------------------------|----------------------------------------------------|------------------------------|------------------------------|---------------------------------|-----------------------------|-----------------|
|                           | 1 µg<br>(Cohort A)<br>N=5 |                                 | 5 µg<br>(Cohort B)<br>N=10 |                                  | 7.5 µg<br>(Cohort D1)<br>N=5 |                                   | 10.0 µg<br>(Cohort C)<br>N=5 |                                   | Pooled Placebo<br>(Cohorts A, B, C,<br>D1)<br>N=10 |                              | 7.5 µg<br>(Cohort D2)<br>N=5 |                                 | Cohort D2<br>Placebo<br>N=2 |                 |
| Test/Time point           | n                         | GMT<br>(95% CI)                 | No                         | GMT<br>(95% CI)                  | n                            | GMT<br>(95% CI)                   | n                            | GMT<br>(95% CI)                   | n                                                  | GMT<br>(95% CI)              | n                            | GMT<br>(95% CI)                 | n                           | GMT<br>(95% CI) |
| <b>Luminex anti-S IgG</b> |                           |                                 |                            |                                  |                              |                                   |                              |                                   |                                                    |                              |                              |                                 | 2                           |                 |
| Day 1                     | 5                         | 274.0<br>(111.06,<br>676.22)    | 10                         | 166.3<br>(86.17,<br>321.01)      | 5                            | 207.5<br>(178.89,<br>240.80)      | 5                            | 511.7<br>(61.69,<br>4244.31)      | 10                                                 | 223.7<br>(126.60,<br>395.45) | 5                            | 141.0<br>(81.90,<br>242.68)     | 2                           | 287.0<br>(NA)   |
| Day 8                     | 5                         | 364.9<br>(151.09,<br>881.32)    | 10                         | 277.1<br>(163.72,<br>468.84)     | 5                            | 221.0<br>(145.26,<br>336.15)      | 5                            | 995.4<br>(54.55,<br>18164.73)     | 10                                                 | 278.1<br>(171.81,<br>450.11) | 5                            | 201.6<br>(117.94,<br>344.69)    | 2                           | 398.1<br>(NA)   |
| Day 15                    | 5                         | 757.8<br>(271.89,<br>2112.02)   | 10                         | 2217.8<br>(888.14,<br>5538.12)   | 5                            | 3698.4<br>(2628.51,<br>5203.68)   | 5                            | 9482.5<br>(787.96,<br>114114.7)   | 10                                                 | 267.1<br>(162.13,<br>440.09) | 5                            | 601.4<br>(135.44,<br>2670.21)   | 2                           | 408.2<br>(NA)   |
| Day 29                    | 5                         | 2130.0<br>(516.21,<br>8788.98)  | 10                         | 4781.1<br>(2121.61,<br>10774.20) | 5                            | 13675.7<br>(6209.51,<br>30119.08) | 5                            | 32748.6<br>(4963.84,<br>216057.2) | 10                                                 | 236.5<br>(133.33,<br>419.49) | 5                            | 2333.3<br>(265.53,<br>20502.83) | 2                           | 392.7<br>(NA)   |
| Day 36                    | 5                         | 2542.6<br>(585.27,<br>11046.15) | 10                         | 4189.3<br>(2212.27,<br>7933.24)  | 5                            | 14898.7<br>(5117.38,<br>43375.93) | 5                            | 26403.5<br>(5567.92,<br>125207.5) | 10                                                 | 289.4<br>(175.29,<br>477.68) | 5                            | 2119.5<br>(252.79,<br>17770.67) | 2                           | 330.5<br>(NA)   |

|                                     | Age 21 – 55               |                                 |                            |                                 |                              |                                   |                              |                                   |                                                    |                              | Age 56 – 80                  |                                 |                             |                 |
|-------------------------------------|---------------------------|---------------------------------|----------------------------|---------------------------------|------------------------------|-----------------------------------|------------------------------|-----------------------------------|----------------------------------------------------|------------------------------|------------------------------|---------------------------------|-----------------------------|-----------------|
|                                     | 1 µg<br>(Cohort A)<br>N=5 |                                 | 5 µg<br>(Cohort B)<br>N=10 |                                 | 7.5 µg<br>(Cohort D1)<br>N=5 |                                   | 10.0 µg<br>(Cohort C)<br>N=5 |                                   | Pooled Placebo<br>(Cohorts A, B, C,<br>D1)<br>N=10 |                              | 7.5 µg<br>(Cohort D2)<br>N=5 |                                 | Cohort D2<br>Placebo<br>N=2 |                 |
| Test/Time point                     | n                         | GMT<br>(95% CI)                 | No                         | GMT<br>(95% CI)                 | n                            | GMT<br>(95% CI)                   | n                            | GMT<br>(95% CI)                   | n                                                  | GMT<br>(95% CI)              | n                            | GMT<br>(95% CI)                 | n                           | GMT<br>(95% CI) |
| Day 43                              | 5                         | 2804.2<br>(680.03,<br>11563.45) | 10                         | 4958.6<br>(2484.11,<br>9898.07) | 5                            | 15480.5<br>(6111.05,<br>39215.12) | 5                            | 28763.3<br>(4965.70,<br>166608.3) | 10                                                 | 298.2<br>(171.99,<br>517.04) | 5                            | 2942.3<br>(477.76,<br>18120.22) | 2                           | 528.8<br>(NA)   |
| Day 56                              | 5                         | 2734.4<br>(616.36,<br>12130.49) | 10                         | 3843.1<br>(1912.88,<br>7721.23) | 5                            | 13573.3<br>(4462.61,<br>41284.14) | 5                            | 21768.1<br>(3916.06,<br>121002.1) | 10                                                 | 297.2<br>(151.31,<br>583.74) | 5                            | 2490.5<br>(318.10,<br>19498.39) | 2                           | 415.0<br>(NA)   |
|                                     |                           |                                 |                            |                                 |                              |                                   |                              |                                   |                                                    |                              |                              |                                 |                             |                 |
| <b>Live Virus PRNT<sub>50</sub></b> |                           |                                 |                            |                                 |                              |                                   |                              |                                   |                                                    |                              |                              |                                 |                             |                 |
| Day 1                               | 5                         | 20.0<br>(20.00,<br>20.00)       | 10                         | 20.0<br>(20.00,<br>20.00)       | 5                            | 20.0<br>(20.00,<br>20.00)         | 5                            | 20.0<br>(20.00,<br>20.00)         | 10                                                 | 20.0<br>(20.00,<br>20.00)    | 5                            | 20.0<br>(20.00,<br>20.00)       | 2                           | 20.0<br>(NA)    |
| Day 29                              | 5                         | 20.0<br>(20.00,<br>20.00)       | 10                         | 24.2<br>(19.50,<br>29.95)       | 5                            | 27.7<br>(11.21,<br>68.46)         | 5                            | 32.9<br>(14.73,<br>73.56)         | 10                                                 | 20.9<br>(19.19,<br>22.68)    | 5                            | 24.0<br>(18.61,<br>30.89)       | 2                           | 20.0<br>(NA)    |
| Day 57                              | 5                         | 20.0<br>(20.00,<br>20.00)       | 10                         | 20.0<br>(20.00,<br>20.00)       | 5                            | 20.0<br>(20.00,<br>20.00)         | 5                            | 20.9<br>(18.48,<br>23.67)         | 10                                                 | 20.0<br>(20.00,<br>20.00)    | 5                            | 20.0<br>(20.00,<br>20.00)       | 2                           | 20.0<br>(NA)    |
|                                     |                           |                                 |                            |                                 |                              |                                   |                              |                                   |                                                    |                              |                              |                                 |                             |                 |

|                               | Age 21 – 55               |                                 |                            |                                |                              |                               |                              |                                  |                                                    |                             | Age 56 – 80                  |                              |                             |                 |
|-------------------------------|---------------------------|---------------------------------|----------------------------|--------------------------------|------------------------------|-------------------------------|------------------------------|----------------------------------|----------------------------------------------------|-----------------------------|------------------------------|------------------------------|-----------------------------|-----------------|
|                               | 1 µg<br>(Cohort A)<br>N=5 |                                 | 5 µg<br>(Cohort B)<br>N=10 |                                | 7.5 µg<br>(Cohort D1)<br>N=5 |                               | 10.0 µg<br>(Cohort C)<br>N=5 |                                  | Pooled Placebo<br>(Cohorts A, B, C,<br>D1)<br>N=10 |                             | 7.5 µg<br>(Cohort D2)<br>N=5 |                              | Cohort D2<br>Placebo<br>N=2 |                 |
| Test/Time point               | n                         | GMT<br>(95% CI)                 | No                         | GMT<br>(95% CI)                | n                            | GMT<br>(95% CI)               | n                            | GMT<br>(95% CI)                  | n                                                  | GMT<br>(95% CI)             | n                            | GMT<br>(95% CI)              | n                           | GMT<br>(95% CI) |
| <b>Luminex anti-S<br/>IgM</b> |                           |                                 |                            |                                |                              |                               |                              |                                  |                                                    |                             |                              |                              |                             |                 |
| Day 1                         | 5                         | 50.0<br>(50.00,<br>50.00)       | 10                         | 73.5<br>(50.77,<br>106.51)     | 5                            | 84.7<br>(44.63,<br>160.91)    | 5                            | 77.9<br>(34.93,<br>173.82)       | 10                                                 | 67.3<br>(47.40,<br>95.49)   | 5                            | 53.0<br>(45.06,<br>62.37)    | 2                           | 73.1<br>(NA)    |
| Day 8                         | 5                         | 53.5<br>(44.37,<br>64.47)       | 10                         | 73.6<br>(53.95,<br>100.50)     | 5                            | 63.9<br>(42.06,<br>97.20)     | 5                            | 140.1<br>(11.23,<br>1749.25)     | 10                                                 | 63.3<br>(46.52,<br>86.06)   | 5                            | 56.1<br>(40.74,<br>77.29)    | 2                           | 116.4<br>(NA)   |
| Day 15                        | 5                         | 90.6<br>(28.15,<br>291.26)      | 10                         | 427.0<br>(141.33,<br>1290.32)  | 5                            | 215.4<br>(104.49,<br>443.91)  | 5                            | 646.9<br>(99.38,<br>4211.00)     | 10                                                 | 60.8<br>(42.94,<br>86.03)   | 5                            | 171.1<br>(69.58,<br>420.93)  | 2                           | 136.4<br>(NA)   |
|                               |                           |                                 |                            |                                |                              |                               |                              |                                  |                                                    |                             |                              |                              |                             |                 |
| <b>Luminex anti-S IgA</b>     |                           |                                 |                            |                                |                              |                               |                              |                                  |                                                    |                             |                              |                              |                             |                 |
| Day 1                         | 5                         | 383.1<br>(36.21,<br>4052.75)    | 10                         | 142.1<br>(56.96,<br>354.28)    | 5                            | 101.1<br>(52.46,<br>194.97)   | 5                            | 236.1<br>(73.94,<br>754.10)      | 10                                                 | 111.7<br>(86.18,<br>144.75) | 5                            | 61.5<br>(44.63,<br>84.76)    | 2                           | 88.3<br>(NA)    |
| Day 29                        | 5                         | 2119.1<br>(159.82,<br>28096.25) | 10                         | 1259.6<br>(336.74,<br>4711.46) | 5                            | 525.3<br>(159.82,<br>1726.38) | 5                            | 9056.6<br>(1083.57,<br>75696.55) | 10                                                 | 84.9<br>(64.26,<br>112.21)  | 5                            | 321.7<br>(88.20,<br>1172.99) | 2                           | 162.9<br>(NA)   |

|                                  | Age 21 – 55               |                 |                            |                         |                              |                          |                              |                 |                                                    |                       | Age 56 – 80                  |                        |                             |                        |
|----------------------------------|---------------------------|-----------------|----------------------------|-------------------------|------------------------------|--------------------------|------------------------------|-----------------|----------------------------------------------------|-----------------------|------------------------------|------------------------|-----------------------------|------------------------|
|                                  | 1 µg<br>(Cohort A)<br>N=5 |                 | 5 µg<br>(Cohort B)<br>N=10 |                         | 7.5 µg<br>(Cohort D1)<br>N=5 |                          | 10.0 µg<br>(Cohort C)<br>N=5 |                 | Pooled Placebo<br>(Cohorts A, B, C,<br>D1)<br>N=10 |                       | 7.5 µg<br>(Cohort D2)<br>N=5 |                        | Cohort D2<br>Placebo<br>N=2 |                        |
| Test/Time point                  | n                         | GMT<br>(95% CI) | No                         | GMT<br>(95% CI)         | n                            | GMT<br>(95% CI)          | n                            | GMT<br>(95% CI) | n                                                  | GMT<br>(95% CI)       | n                            | GMT<br>(95% CI)        | n                           | GMT<br>(95% CI)        |
| <b>Luminex anti-RBD<br/>IgG*</b> |                           |                 |                            |                         |                              |                          |                              |                 |                                                    |                       |                              |                        |                             |                        |
| Day 1                            |                           |                 | 10                         | 574<br>(467;<br>707)    | 5                            | 631<br>(411;<br>969)     |                              |                 | 6                                                  | 513<br>(340;<br>774)  | 5                            | 510<br>(369;<br>705)   | 2                           | 926<br>(8;<br>113760)  |
| Day 29                           |                           |                 | 10                         | 2618<br>(1299;<br>5276) | 5                            | 3578<br>(1171;<br>10932) |                              |                 | 6                                                  | 653<br>(389;<br>1098) | 5                            | 1665<br>(717;<br>3869) | 2                           | 1113<br>(52;<br>23697) |
| <b>Luminex anti-NTD<br/>IgG*</b> |                           |                 |                            |                         |                              |                          |                              |                 |                                                    |                       |                              |                        |                             |                        |
| Day 1                            |                           |                 | 10                         | 276<br>(242;<br>314)    | 5                            | 269<br>(223;<br>326)     |                              |                 | 6                                                  | 308<br>(198;<br>481)  | 5                            | 269<br>(202;<br>357)   | 2                           | 347<br>(61;<br>1964)   |
| Day 29                           |                           |                 | 10                         | 443<br>(359;<br>548)    | 5                            | 446<br>(260;<br>766)     |                              |                 | 6                                                  | 323<br>(220;<br>474)  | 5                            | 420<br>(290;<br>608)   | 2                           | 309<br>(174;<br>549)   |
|                                  |                           |                 |                            |                         |                              |                          |                              |                 |                                                    |                       |                              |                        |                             |                        |



|                         | Age 21 – 55               |                 |                            |                          |                              |                             |                              |                 |                                                    |                       | Age 56 – 80                  |                         |                             |                      |
|-------------------------|---------------------------|-----------------|----------------------------|--------------------------|------------------------------|-----------------------------|------------------------------|-----------------|----------------------------------------------------|-----------------------|------------------------------|-------------------------|-----------------------------|----------------------|
|                         | 1 µg<br>(Cohort A)<br>N=5 |                 | 5 µg<br>(Cohort B)<br>N=10 |                          | 7.5 µg<br>(Cohort D1)<br>N=5 |                             | 10.0 µg<br>(Cohort C)<br>N=5 |                 | Pooled Placebo<br>(Cohorts A, B, C,<br>D1)<br>N=10 |                       | 7.5 µg<br>(Cohort D2)<br>N=5 |                         | Cohort D2<br>Placebo<br>N=2 |                      |
| Test/Time point         | n                         | GMT<br>(95% CI) | No                         | GMT<br>(95% CI)          | n                            | GMT<br>(95% CI)             | n                            | GMT<br>(95% CI) | n                                                  | GMT<br>(95% CI)       | n                            | GMT<br>(95% CI)         | n                           | GMT<br>(95% CI)      |
| Luminex anti-S2<br>IgG* |                           |                 |                            |                          |                              |                             |                              |                 |                                                    |                       |                              |                         |                             |                      |
| Day 1                   |                           |                 | 10                         | 305<br>(156;<br>596)     | 5                            | 204<br>(149;<br>279)        |                              |                 | 6                                                  | 390<br>(144;<br>1055) |                              | 192<br>(116;<br>317)    | 2                           | 276<br>(215;<br>356) |
| Day 29                  |                           |                 | 10                         | 9703<br>(3631;<br>25928) | 5                            | 55676<br>(18159;<br>170702) |                              |                 | 6                                                  | 380<br>(152;<br>953)  |                              | 6520<br>(506;<br>83940) | 2                           | 270<br>(101;<br>725) |

S = Full-Length SARS-CoV-2 Spike Protein; S2 = S2 domain of SARS-CoV-2 Spike Protein, RBD = receptor binding domain of SARS-CoV-2 Spike Protein; NTD =N-terminal domain of SARS-CoV-2 Spike Protein; PRNT =Plaque Reduction Neutralization Test; GMT=Geometric Mean Titer; CI=Confidence Interval;

N represents the total number of subjects in each cohort. n represents the number of subjects contributing to the summary.

\*IgG titers against RBD, NTD and S2 not assessed for subjects in Cohorts A and C.

**Supplementary Table 6. Antibody responses in 2-Dose Cohorts**

|                           | Age 21 – 55                |                                   |                            |                                    |                                           |                              | Age 56 – 80                |                                  |                            |                                   |                                           |                              |
|---------------------------|----------------------------|-----------------------------------|----------------------------|------------------------------------|-------------------------------------------|------------------------------|----------------------------|----------------------------------|----------------------------|-----------------------------------|-------------------------------------------|------------------------------|
| Test/Time point           | 3 µg<br>(Cohort F)<br>N=12 |                                   | 5 µg<br>(Cohort E)<br>N=12 |                                    | Cohorts<br>E & F Pooled<br>Placebo<br>N=8 |                              | 3 µg<br>(Cohort H)<br>N=12 |                                  | 5 µg<br>(Cohort G)<br>N=12 |                                   | Cohorts<br>G & H Pooled<br>Placebo<br>N=8 |                              |
|                           | n                          | GMT<br>(95% CI)                   | n                          | GMT<br>(95% CI)                    | n                                         | GMT<br>(95% CI)              | n                          | GMT<br>(95% CI)                  | n                          | GMT<br>(95% CI)                   | n                                         | GMT<br>(95% CI)              |
| <b>Luminex anti-S IgG</b> |                            |                                   |                            |                                    |                                           |                              |                            |                                  |                            |                                   |                                           |                              |
| Day 1                     | 12                         | 261.9<br>(170.17,<br>403.15)      | 12                         | 321.8<br>(244.70,<br>423.10)       | 8                                         | 251.8<br>(140.56,<br>451.18) | 12                         | 410.2<br>(221.33,<br>760.35)     | 12                         | 334.4<br>(218.67,<br>511.27)      | 8                                         | 421.2<br>(286.14,<br>620.11) |
| Day 15                    | 12                         | 1894.6<br>(511.61,<br>7016.17)    | 12                         | 1836.6<br>(1032.43,<br>3267.05)    | 8                                         | 201.0<br>(71.11,<br>568.04)  | 12                         | 947.0<br>(342.52,<br>2618.17)    | 12                         | 1423.6<br>(573.93,<br>3531.12)    | 8                                         | 339.2<br>(162.05,<br>710.14) |
| Day 29                    | 12                         | 5507.2<br>(1782.55,<br>17014.70)  | 12                         | 5614.9<br>(3669.54,<br>8591.57)    | 8                                         | 299.1<br>(160.18,<br>558.63) | 12                         | 2450.7<br>(750.65,<br>8000.85)   | 12                         | 8407.0<br>(3437.58,<br>20560.50)  | 8                                         | 266.2<br>(135.63,<br>522.46) |
| Day 36                    | 12                         | 5677.3<br>(1683.63,<br>19144.15)  | 12                         | 7130.1<br>(4294.36,<br>11838.49)   | 8                                         | 215.2<br>(81.58,<br>567.53)  | 12                         | 2971.1<br>(923.92,<br>9554.20)   | 12                         | 7583.3<br>(3348.57,<br>17173.44)  | 8                                         | 381.6<br>(216.40,<br>672.96) |
| Day 43                    | 12                         | 14481.0<br>(6079.57,<br>34492.51) | 12                         | 16771.9<br>(10507.27,<br>26771.56) | 8                                         | 232.4<br>(109.91,<br>491.39) | 12                         | 5085.5<br>(1348.87,<br>19173.26) | 12                         | 16513.5<br>(7432.56,<br>36689.28) | 8                                         | 335.8<br>(128.80,<br>875.63) |

| Test/Time point                     | Age 21 – 55                |                                   |                            |                                   |                                           |                              | Age 56 – 80                |                                  |                            |                                   |                                           |                              |
|-------------------------------------|----------------------------|-----------------------------------|----------------------------|-----------------------------------|-------------------------------------------|------------------------------|----------------------------|----------------------------------|----------------------------|-----------------------------------|-------------------------------------------|------------------------------|
|                                     | 3 µg<br>(Cohort F)<br>N=12 |                                   | 5 µg<br>(Cohort E)<br>N=12 |                                   | Cohorts<br>E & F Pooled<br>Placebo<br>N=8 |                              | 3 µg<br>(Cohort H)<br>N=12 |                                  | 5 µg<br>(Cohort G)<br>N=12 |                                   | Cohorts<br>G & H Pooled<br>Placebo<br>N=8 |                              |
|                                     | n                          | GMT<br>(95% CI)                   | n                          | GMT<br>(95% CI)                   | n                                         | GMT<br>(95% CI)              | n                          | GMT<br>(95% CI)                  | n                          | GMT<br>(95% CI)                   | n                                         | GMT<br>(95% CI)              |
| Day 57                              | 12                         | 13079.9<br>(5068.41,<br>33755.04) | 12                         | 16558.1<br>(9486.89,<br>28899.99) | 8                                         | 360.0<br>(189.44,<br>684.30) | 12                         | 5903.9<br>(1967.62,<br>17714.81) | 12                         | 10375.4<br>(5580.18,<br>19291.17) | 8                                         | 386.4<br>(200.55,<br>744.63) |
| Day 85                              | 12                         | 9526.0<br>(4090.22,<br>22185.61)  | 12                         | 11592.6<br>(6630.05,<br>20269.63) | 8                                         | 265.9<br>(113.09,<br>625.08) | 12                         | 5463.5<br>(2085.67,<br>14312.11) | 12                         | 11998.1<br>(5247.08,<br>27435.30) | 8                                         | 421.1<br>(205.39,<br>863.45) |
|                                     |                            |                                   |                            |                                   |                                           |                              |                            |                                  |                            |                                   |                                           |                              |
| <b>Live Virus PRNT<sub>50</sub></b> |                            |                                   |                            |                                   |                                           |                              |                            |                                  |                            |                                   |                                           |                              |
| Day 1                               | 12                         | 20.0<br>(20.00,<br>20.00)         | 12                         | 20.0<br>(20.00,<br>20.00)         | 8                                         | 20.0<br>(20.00,<br>20.00)    | 12                         | 20.0<br>(20.00,<br>20.00)        | 12                         | 20.0<br>(20.00,<br>20.00)         | 8                                         | 20.0<br>(20.00,<br>20.00)    |
| Day 29                              | 12                         | 27.3<br>(17.41,<br>42.84)         | 12                         | 29.3<br>(23.09,<br>37.13)         | 8                                         | 20.0<br>(20.00,<br>20.00)    | 12                         | 22.5<br>(19.47,<br>26.10)        | 12                         | 20.6<br>(19.34,<br>21.88)         | 8                                         | 20.0<br>(20.00,<br>20.00)    |
| Day 43                              | 12                         | 34.9<br>(24.14,<br>50.38)         | 12                         | 51.8<br>(32.30,<br>83.21)         | 8                                         | 20.0<br>(20.00,<br>20.00)    | 12                         | 27.1<br>(15.17,<br>48.35)        | 12                         | 24.0<br>(20.56,<br>27.95)         | 8                                         | 20.0<br>(20.00,<br>20.00)    |

| Test/Time point           | Age 21 – 55                |                              |                            |                              |                                           |                              | Age 56 – 80                |                             |                            |                             |                                           |                              |
|---------------------------|----------------------------|------------------------------|----------------------------|------------------------------|-------------------------------------------|------------------------------|----------------------------|-----------------------------|----------------------------|-----------------------------|-------------------------------------------|------------------------------|
|                           | 3 µg<br>(Cohort F)<br>N=12 |                              | 5 µg<br>(Cohort E)<br>N=12 |                              | Cohorts<br>E & F Pooled<br>Placebo<br>N=8 |                              | 3 µg<br>(Cohort H)<br>N=12 |                             | 5 µg<br>(Cohort G)<br>N=12 |                             | Cohorts<br>G & H Pooled<br>Placebo<br>N=8 |                              |
|                           | n                          | GMT<br>(95% CI)              | n                          | GMT<br>(95% CI)              | n                                         | GMT<br>(95% CI)              | n                          | GMT<br>(95% CI)             | n                          | GMT<br>(95% CI)             | n                                         | GMT<br>(95% CI)              |
| Day 57                    | 12                         | 23.8<br>(17.39,<br>32.47)    | 12                         | 36.0<br>(24.32,<br>53.16)    | 8                                         | 20.0<br>(20.00,<br>20.00)    | 12                         | 29.7<br>(15.63,<br>56.37)   | 12                         | 20.4<br>(19.71,<br>21.09)   | 8                                         | 20.0<br>(20.00,<br>20.00)    |
| Day 85                    | 11                         | 24.4<br>(17.88,<br>33.30)    | 12                         | 25.0<br>(18.94,<br>33.06)    | 8                                         | 20.0<br>(20.00,<br>20.00)    | 11                         | 27.0<br>(16.51,<br>44.13)   | 12                         | 20.0<br>(20.00,<br>20.00)   | 8                                         | 20.0<br>(20.00,<br>20.00)    |
| <b>Luminex anti-S IgM</b> |                            |                              |                            |                              |                                           |                              |                            |                             |                            |                             |                                           |                              |
| Day 1                     | 12                         | 61.5<br>(42.99,<br>88.04)    | 12                         | 62.6<br>(50.74,<br>77.19)    | 8                                         | 71.8<br>(52.43,<br>98.23)    | 12                         | 83.1<br>(60.16,<br>114.66)  | 12                         | 62.7<br>(47.16,<br>83.40)   | 8                                         | 59.2<br>(42.82,<br>81.82)    |
| Day 15                    | 12                         | 222.7<br>(108.47,<br>457.22) | 12                         | 194.5<br>(128.76,<br>293.83) | 8                                         | 60.7<br>(38.50,<br>95.81)    | 12                         | 145.1<br>(64.55,<br>326.32) | 12                         | 114.1<br>(65.55,<br>198.53) | 8                                         | 54.3<br>(45.75,<br>64.53)    |
| <b>Luminex anti-S IgA</b> |                            |                              |                            |                              |                                           |                              |                            |                             |                            |                             |                                           |                              |
| Day 1                     | 12                         | 149.2<br>(111.02,<br>200.55) | 12                         | 107.1<br>(79.89,<br>143.45)  | 8                                         | 164.9<br>(119.89,<br>226.68) | 12                         | 182.4<br>(93.43,<br>356.08) | 12                         | 127.7<br>(99.85,<br>163.38) | 8                                         | 225.2<br>(157.52,<br>322.02) |

| Test/Time point                  | Age 21 – 55                |                               |                            |                               |                                           |                              | Age 56 – 80                |                                |                            |                                |                                           |                              |
|----------------------------------|----------------------------|-------------------------------|----------------------------|-------------------------------|-------------------------------------------|------------------------------|----------------------------|--------------------------------|----------------------------|--------------------------------|-------------------------------------------|------------------------------|
|                                  | 3 µg<br>(Cohort F)<br>N=12 |                               | 5 µg<br>(Cohort E)<br>N=12 |                               | Cohorts<br>E & F Pooled<br>Placebo<br>N=8 |                              | 3 µg<br>(Cohort H)<br>N=12 |                                | 5 µg<br>(Cohort G)<br>N=12 |                                | Cohorts<br>G & H Pooled<br>Placebo<br>N=8 |                              |
|                                  | n                          | GMT<br>(95% CI)               | n                          | GMT<br>(95% CI)               | n                                         | GMT<br>(95% CI)              | n                          | GMT<br>(95% CI)                | n                          | GMT<br>(95% CI)                | n                                         | GMT<br>(95% CI)              |
| Day 29                           | 12                         | 704.6<br>(445.38,<br>1114.72) | 12                         | 413.6<br>(255.87,<br>668.45)  | 8                                         | 186.4<br>(129.55,<br>268.28) | 12                         | 853.5<br>(278.06,<br>2619.52)  | 12                         | 619.8<br>(186.82,<br>2056.61)  | 8                                         | 174.0<br>(85.99,<br>352.00)  |
| Day 57                           | 12                         | 519.8<br>(306.07,<br>882.76)  | 12                         | 631.8<br>(364.71,<br>1094.58) | 8                                         | 121.6<br>(86.83,<br>170.31)  | 12                         | 1034.3<br>(325.44,<br>3287.32) | 12                         | 1174.9<br>(341.39,<br>4043.68) | 8                                         | 250.5<br>(137.70,<br>455.66) |
|                                  |                            |                               |                            |                               |                                           |                              |                            |                                |                            |                                |                                           |                              |
| <b>Luminex anti-RBD<br/>IgG*</b> |                            |                               |                            |                               |                                           |                              |                            |                                |                            |                                |                                           |                              |
| Day 1                            |                            |                               | 12                         | 648<br>(480,<br>876)          | 4                                         | 731<br>(329,<br>1624)        |                            |                                | 12                         | 506<br>(430,<br>596)           | 4                                         | 580<br>(417,<br>806)         |
| Day 29                           |                            |                               | 12                         | 1606<br>(1227,<br>2103)       | 4                                         | 672<br>(632,<br>714)         |                            |                                | 12                         | 1048<br>(696,<br>1579)         | 4                                         | 649<br>(378,<br>1114)        |
| Day 57                           |                            |                               | 12                         | 4211<br>(2665,<br>6656)       | 4                                         | 505<br>(402,<br>634)         |                            |                                | 12                         | 3190<br>(1744,<br>5833)        | 4                                         | 798<br>(553,<br>1151)        |
|                                  |                            |                               |                            |                               |                                           |                              |                            |                                |                            |                                |                                           |                              |

| Test/Time point                  | Age 21 – 55                |                 |                            |                        |                                           |                        | Age 56 – 80                |                 |                            |                        |                                           |                       |
|----------------------------------|----------------------------|-----------------|----------------------------|------------------------|-------------------------------------------|------------------------|----------------------------|-----------------|----------------------------|------------------------|-------------------------------------------|-----------------------|
|                                  | 3 µg<br>(Cohort F)<br>N=12 |                 | 5 µg<br>(Cohort E)<br>N=12 |                        | Cohorts<br>E & F Pooled<br>Placebo<br>N=8 |                        | 3 µg<br>(Cohort H)<br>N=12 |                 | 5 µg<br>(Cohort G)<br>N=12 |                        | Cohorts<br>G & H Pooled<br>Placebo<br>N=8 |                       |
|                                  | n                          | GMT<br>(95% CI) | n                          | GMT<br>(95% CI)        | n                                         | GMT<br>(95% CI)        | n                          | GMT<br>(95% CI) | n                          | GMT<br>(95% CI)        | n                                         | GMT<br>(95% CI)       |
| <b>Luminex anti-NTD<br/>IgG*</b> |                            |                 |                            |                        |                                           |                        |                            |                 |                            |                        |                                           |                       |
| Day 1                            |                            |                 | 12                         | 466<br>(296,<br>731)   | 4                                         | 600<br>(211,<br>1709)  |                            |                 | 12                         | 468<br>(377,<br>581)   | 4                                         | 519<br>(260,<br>1034) |
| Day 29                           |                            |                 | 12                         | 862<br>(746,<br>995)   | 4                                         | 643<br>(611,<br>676)   |                            |                 | 12                         | 569<br>(441,<br>734)   | 4                                         | 567<br>(353,<br>913)  |
| Day 57                           |                            |                 | 12                         | 1169<br>(923,<br>1479) | 4                                         | 505<br>(416,<br>614)   |                            |                 | 12                         | 1083<br>(781,<br>1502) | 4                                         | 747<br>(497,<br>1124) |
|                                  |                            |                 |                            |                        |                                           |                        |                            |                 |                            |                        |                                           |                       |
| <b>Luminex anti-S2<br/>IgG*</b>  |                            |                 |                            |                        |                                           |                        |                            |                 |                            |                        |                                           |                       |
| Day 1                            |                            |                 | 12                         | 590<br>(334,<br>1045)  | 4                                         | 1255<br>(937,<br>1681) |                            |                 | 12                         | 503<br>(374,<br>678)   | 4                                         | 486<br>(234,<br>1010) |

| Test/Time point | Age 21 – 55                |                 |                            |                           |                                           |                        | Age 56 – 80                |                 |                            |                            |                                           |                      |
|-----------------|----------------------------|-----------------|----------------------------|---------------------------|-------------------------------------------|------------------------|----------------------------|-----------------|----------------------------|----------------------------|-------------------------------------------|----------------------|
|                 | 3 µg<br>(Cohort F)<br>N=12 |                 | 5 µg<br>(Cohort E)<br>N=12 |                           | Cohorts<br>E & F Pooled<br>Placebo<br>N=8 |                        | 3 µg<br>(Cohort H)<br>N=12 |                 | 5 µg<br>(Cohort G)<br>N=12 |                            | Cohorts<br>G & H Pooled<br>Placebo<br>N=8 |                      |
|                 | n                          | GMT<br>(95% CI) | n                          | GMT<br>(95% CI)           | n                                         | GMT<br>(95% CI)        | n                          | GMT<br>(95% CI) | n                          | GMT<br>(95% CI)            | n                                         | GMT<br>(95% CI)      |
| Day 29          |                            |                 | 12                         | 9262<br>(5455,<br>15724)  | 4                                         | 1238<br>(447,<br>3430) |                            |                 | 12                         | 10133<br>(5034,<br>20396)  | 4                                         | 546<br>(410,<br>726) |
| Day 57          |                            |                 | 12                         | 15272<br>(7489,<br>31144) | 4                                         | 1049<br>(361,<br>3045) |                            |                 | 12                         | 22794<br>(13235,<br>39258) | 4                                         | 798<br>(675,<br>944) |

S = Full-Length SARS-CoV-2 Spike Protein; S2 = S2 domain of SARS-CoV-2 Spike Protein, RBD = receptor binding domain of SARS-CoV-2 Spike Protein; NTD =N-terminal domain of SARS-CoV-2 Spike Protein; PRNT =Plaque Reduction Neutralization Test; GMT=Geometric Mean Titer; CI=Confidence Interval;

N represents the total number of subjects in each cohort. n represents the number of subjects contributing to the summary.

\*IgG titers against RBD, NTD and S2 were not assessed for subjects in cohorts F and H.

**Supplementary Table 7. Anti-Spike IgG and Neutralization sero-conversion in 1-Dose Cohorts**

|                                                                | Age 21 – 55        |                    |                       |                       |                                            | Age 56 – 80           |                        |
|----------------------------------------------------------------|--------------------|--------------------|-----------------------|-----------------------|--------------------------------------------|-----------------------|------------------------|
| Time point                                                     | 1 µg<br>(Cohort A) | 5 µg<br>(Cohort B) | 7.5 µg<br>(Cohort D1) | 10.0 µg<br>(Cohort C) | Pooled Placebo<br>(Cohorts A, B,<br>C, D1) | 7.5 µg<br>(Cohort D2) | Placebo<br>(Cohort D2) |
| <b>Anti-Spike IgG Sero-conversion, % (n/N)*</b>                |                    |                    |                       |                       |                                            |                       |                        |
| Day 1                                                          | -                  | -                  | -                     | -                     | -                                          | -                     | -                      |
| Day 8                                                          | 0 (0/5)            | 10 (1/10)          | 0 (0/5)               | 20 (1/5)              | 0 (0/10)                                   | 0 (0/5)               | 0 (0/10)               |
| Day 15                                                         | 20 (1/5)           | 90 (9/10)          | 100 (5/5)             | 100 (5/5)             | 0 (0/10)                                   | 20 (1/5)              | 0 (0/10)               |
| Day 29                                                         | 80 (4/5)           | 100 (10/10)        | 100 (5/5)             | 100 (5/5)             | 0 (0/10)                                   | 80 (4/5)              | 0 (0/10)               |
| Day 36                                                         | 80 (4/5)           | 100 (10/10)        | 100 (5/5)             | 100 (5/5)             | 0 (0/10)                                   | 80 (4/5)              | 0 (0/10)               |
| Day 43                                                         | 80 (4/5)           | 100 (10/10)        | 100 (5/5)             | 100 (5/5)             | 0 (0/10)                                   | 80 (4/5)              | 0 (0/10)               |
| Day 57                                                         | 80 (4/5)           | 100 (10/10)        | 100 (5/5)             | 100 (5/5)             | 0 (0/10)                                   | 80 (4/5)              | 0 (0/10)               |
|                                                                |                    |                    |                       |                       |                                            |                       |                        |
| <b>Live Virus PRNT<sub>50</sub> Sero-conversion, % (n/N)**</b> |                    |                    |                       |                       |                                            |                       |                        |
| Day 1                                                          | 0 (0/5)            | 0 (0/10)           | 0 (0/5)               | 0 (0/5)               | 0 (0/10)                                   | 0 (0/5)               | 0 (0/10)               |
| Day 29                                                         | 0 (0/5)            | 50 (5/10)          | 20 (1/5)              | 60 (3/5)              | 0 (0/10)                                   | 80 (4/5)              | 0 (0/10)               |
| Day 57                                                         | 0 (0/5)            | 0 (0/10)           | 0 (0/5)               | 20 (1/5)              | 0 (0/10)                                   | 0 (0/5)               | 0 (0/10)               |

\*Anti-Spike IgG Sero-conversion defined as 4 fold increase in Spike IgG endpoint titer from baseline (i.e. Day 1)

\*\* Anti-Spike IgG Sero-conversion defined as PRNT titers > 20.



**Supplementary Table 8. Anti-Spike IgG and Neutralization sero-conversion in 2-Dose Cohorts**

| Time point                                                   | Age 21 – 55        |                    |                                         | Age 56 – 80        |                    |                                        |
|--------------------------------------------------------------|--------------------|--------------------|-----------------------------------------|--------------------|--------------------|----------------------------------------|
|                                                              | 3 µg<br>(Cohort F) | 5 µg<br>(Cohort E) | Pooled<br>Placebo<br>(Cohorts<br>E & F) | 3 µg<br>(Cohort H) | 5 µg<br>(Cohort G) | Pooled<br>Placebo<br>(Cohorts<br>G &H) |
| <b>Anti-Spike IgG Sero-conversion, % (n/N)</b>               |                    |                    |                                         |                    |                    |                                        |
| Day 1                                                        | -                  | -                  | -                                       | -                  | -                  | -                                      |
| Day 15                                                       | 75 (9/12)          | 75 (9/12)          | 0 (8/8)                                 | 17 (2/12)          | 50 (6/12)          | 0 (8/8)                                |
| Day 29                                                       | 92 (11/12)         | 100 (12/12)        | 0 (8/8)                                 | 58 (7/12)          | 92 (11/12)         | 0 (8/8)                                |
| Day 36                                                       | 83 (10/12)         | 100 (12/12)        | 0 (8/8)                                 | 58 (7/12)          | 92 (11/12)         | 0 (8/8)                                |
| Day 43                                                       | 100 (12/12)        | 100 (12/12)        | 0 (8/8)                                 | 75 (9/12)          | 100 (12/12)        | 0 (8/8)                                |
| Day 57                                                       | 100 (12/12)        | 100 (12/12)        | 0 (8/8)                                 | 100 (12/12)        | 100 (12/12)        | 0 (8/8)                                |
| Day 85                                                       | 100 (12/12)        | 100 (12/12)        | 0 (8/8)                                 | 100 (12/12)        | 100 (12/12)        | 0 (8/8)                                |
|                                                              |                    |                    |                                         |                    |                    |                                        |
| <b>Live Virus PRNT<sub>50</sub> Sero-conversion, % (n/N)</b> |                    |                    |                                         |                    |                    |                                        |
| Day 1                                                        | 0 (12/12)          | 0 (12/12)          | 0 (8/8)                                 | 0 (12/12)          | 0 (12/12)          | 0 (8/8)                                |
| Day 29                                                       | 25 (3/12)          | 67 (8/12)          | 0 (8/8)                                 | 25 (3/12)          | 8 (1/12)           | 0 (8/8)                                |
| Day 43                                                       | 83 (10/12)         | 83 (10/12)         | 0 (8/8)                                 | 17 (2/12)          | 50 (6/12)          | 0 (8/8)                                |
| Day 57                                                       | 17 (2/12)          | 58 (7/12)          | 0 (8/8)                                 | 25 (3/12)          | 17 (2/12)          | 0 (8/8)                                |
| Day 85                                                       | 17 (2/12)          | 33 (4/12)          | 0 (8/8)                                 | 17 (2/12)          | 0 (12/12)          | 0 (8/8)                                |

\*Anti-Spike IgG Sero-conversion defined as 4 fold increase in Spike IgG endpoint titer from baseline (i.e. Day 1)

\*\* Anti-Spike IgG Sero-conversion defined as PRNT titers > 20.

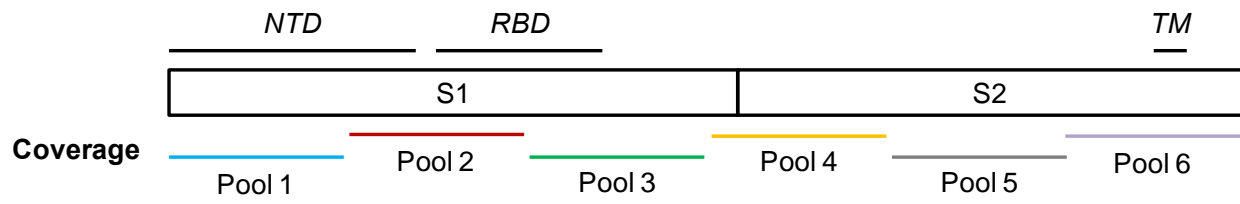

**Supplementary Figure 1. Spike location of the peptide pools used in the cellular assays.**

**A. 21-55 yrs of age**

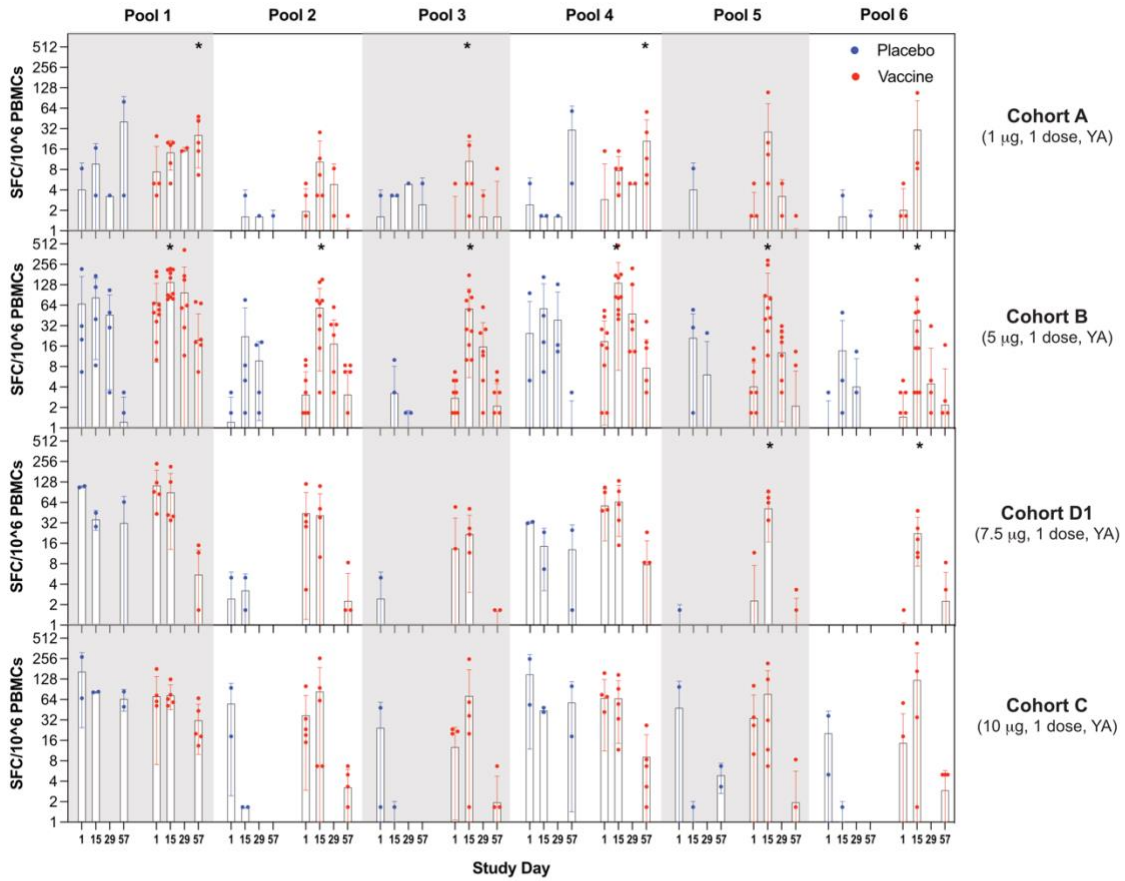

**B. 56-80 yrs of age**

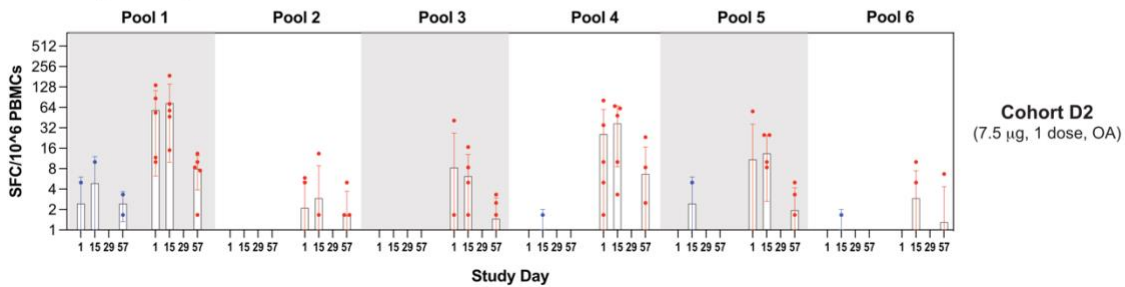

**Supplementary Figure 2. T cell responses to a single dose of ARCT-021.** T cell responses were measured using an interferon gamma (IFN $\gamma$ ) enzyme-linked immune absorbent spot (ELISPOT) assay and represented as spot-forming cells (SFC) per million PBMCs (Panel A and B). Displayed ELISPOT results are for six peptide pools spanning the entire SARS-CoV-2 Spike. The whiskers display standard deviation (SD) around the mean (horizontal bar). Each dot represents an individual participant. T cell responses at each timepoint were compared to baseline (i.e. day 1) using Mann-Whitney U test. All statistically significant ( $P < 0.05$ ) increases above baseline are marked with an asterisk (\*).

A. 21-55 yrs of age

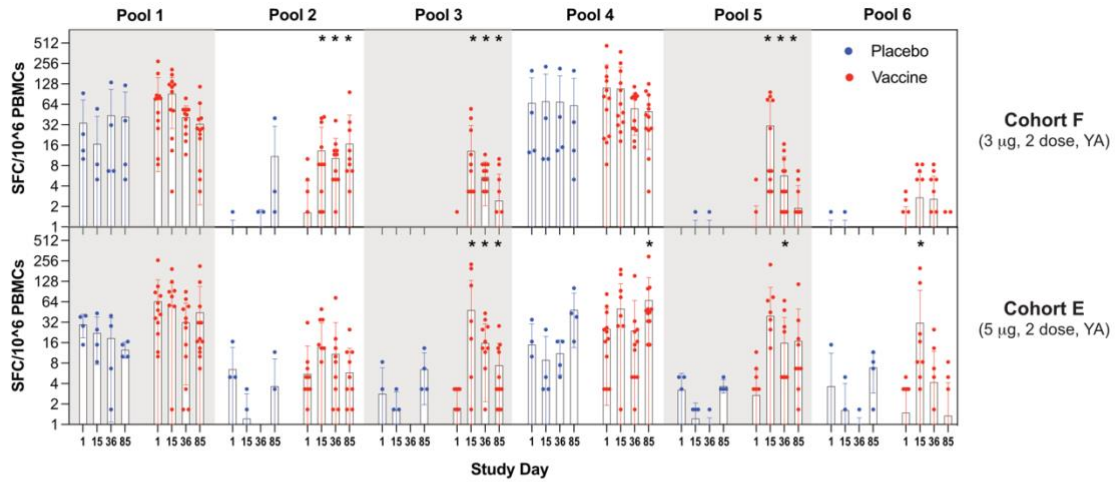

B. 56-80 yrs of age

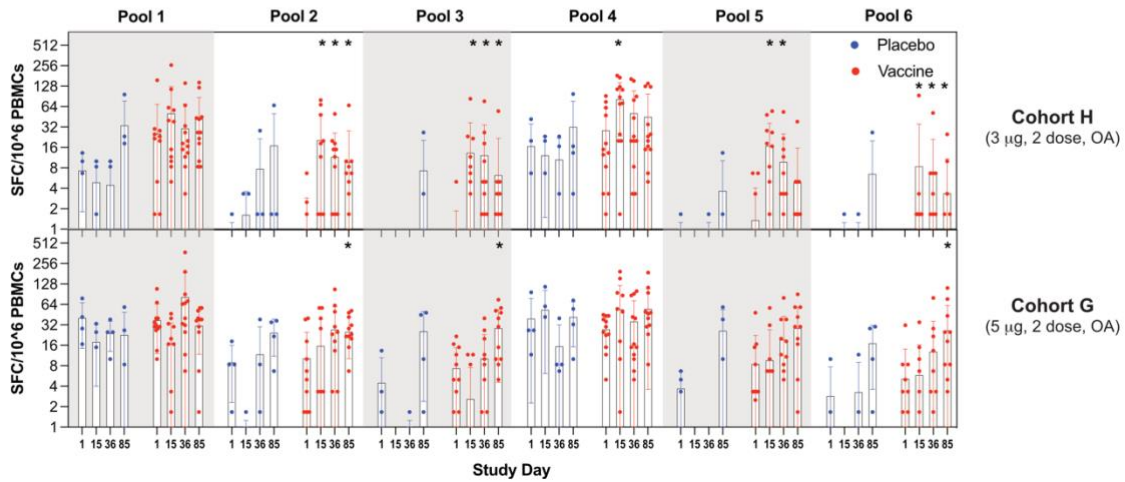

**Supplementary Figure 3. Cellular immune responses in 2 dose cohorts.** IFN $\gamma$  ELISPOT responses to six peptide pools spanning the entire SARS-CoV-2 Spike were measured in young (Panel A) and old cohorts (Panel B). ELISPOT responses. In bar graphs, the whiskers display standard deviation (SD) around the mean (horizontal bar). Each dot represents an individual participant. T cell responses at each timepoint were compared to baseline (i.e. day 1) using Mann-Whitney U test. All statistically significant ( $P < 0.05$ ) increases above baseline are marked with an asterisk (\*).

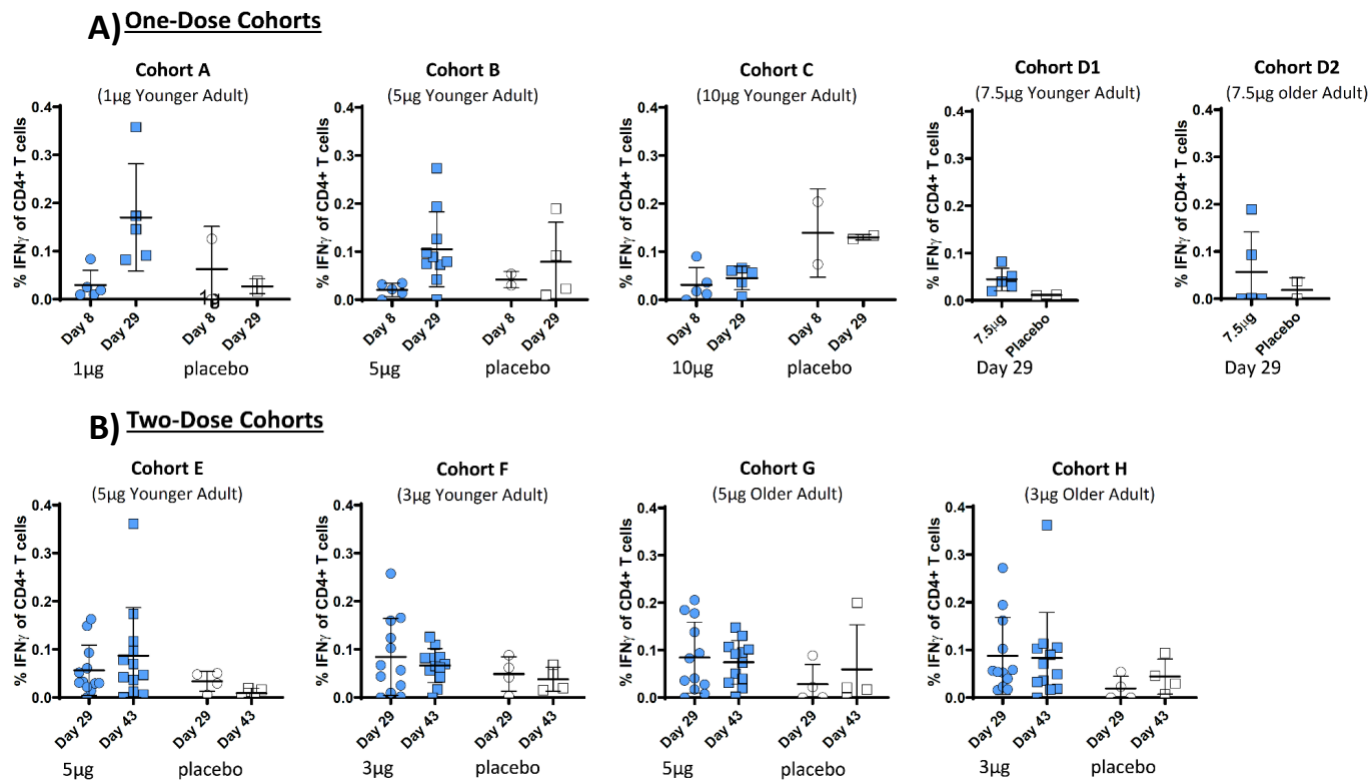

**Supplementary Figure 4. Antigen-specific IFN $\gamma$  CD4 T cell responses by ICS.**

Total antigen-specific IFN $\gamma$  responses in CD4 T cells following stimulation with Spike peptide pools are presented for one-dose (Panel A) and two-dose (Panel B) cohorts. Horizontal bar displays mean per group with error bars depicting the standard deviation (SD). Each dot represents an individual participant. Younger adults 21-55 years; older adults 56-80 years.

### A) One-Dose Cohorts

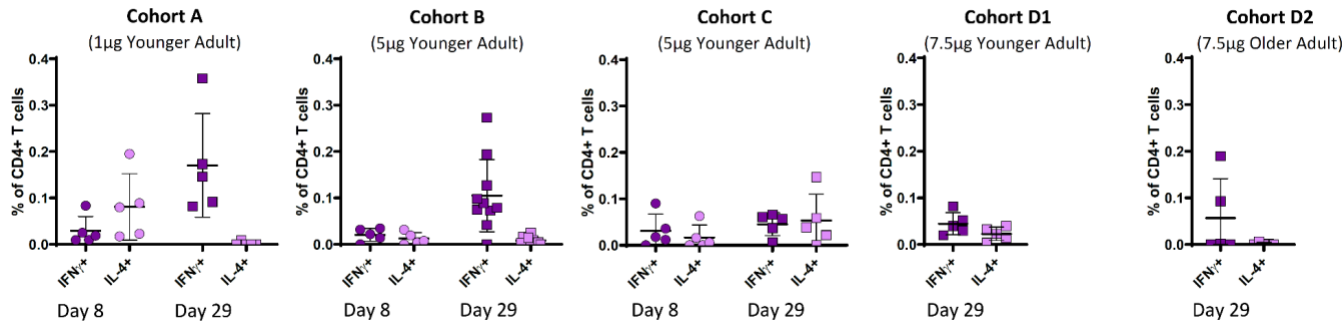

### B) Two-Dose Cohorts

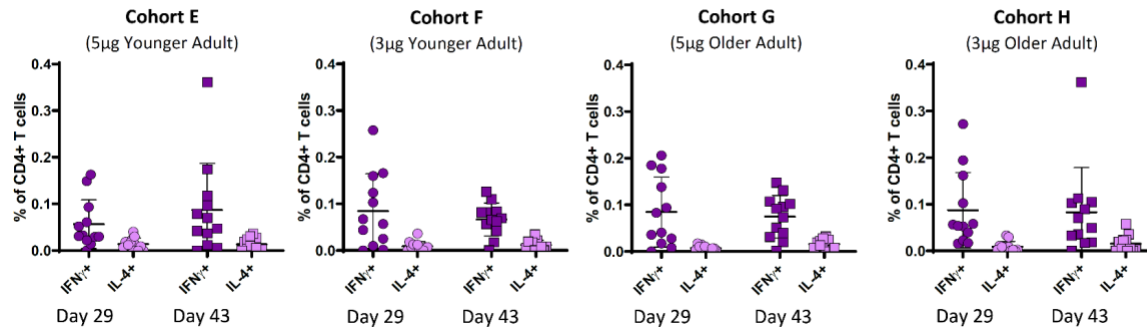

### Supplementary Figure 5. Antigen-specific IFN $\gamma$ and IL4 CD4 T cell responses by ICS.

Total antigen-specific IFN $\gamma$  and IL4 responses in CD4 T cells following stimulation with Spike peptide pools were measured to assess Th1 responses. Figure presents data for one-dose (Panel A) and two-dose (Panel B) cohorts. Horizontal bar displays mean per group with error bars depicting the standard deviation (SD). Each dot represents an individual participant. Younger adults 21-55 years; older adults 56-80. No notable differences between ARCT-021 and placebo for IL-2 and TNF-alpha responses and data therefore not shown.

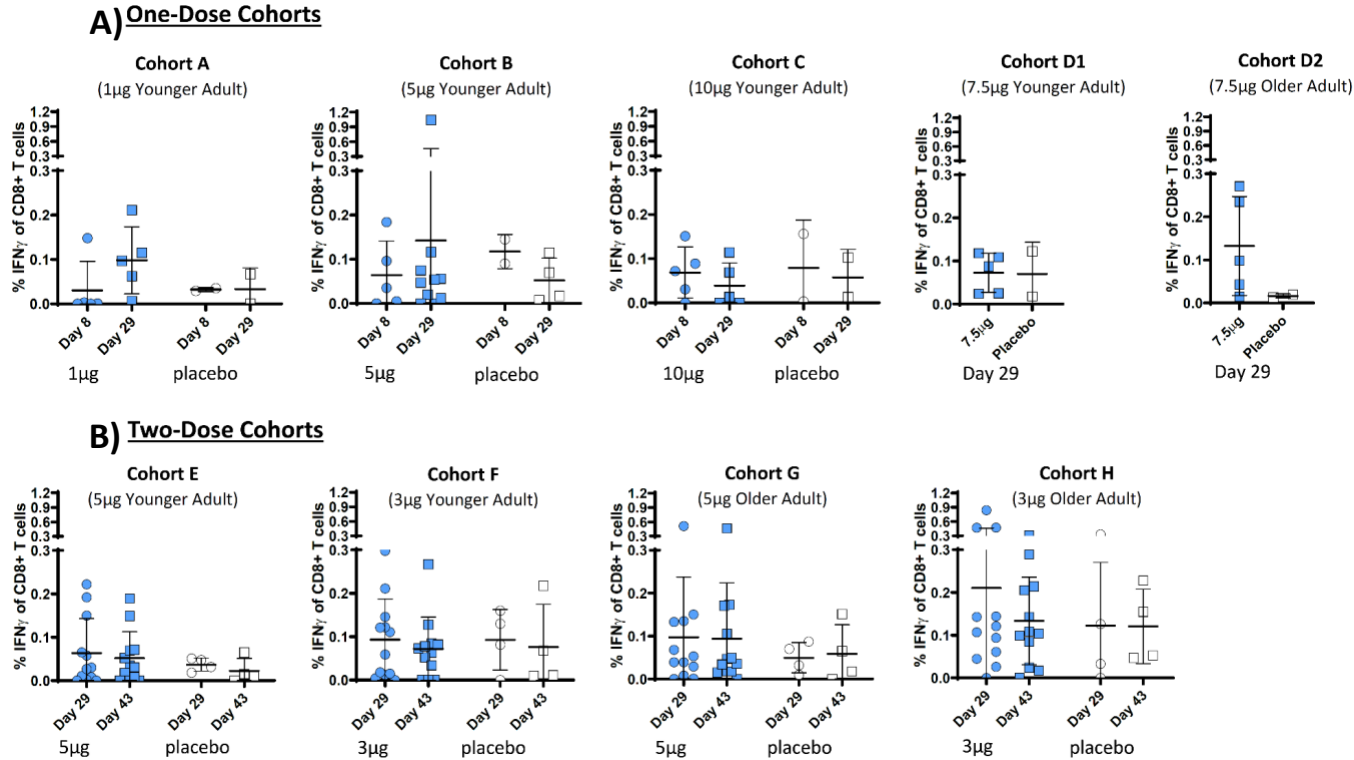

**Supplementary Figure 6. Antigen-specific IFN $\gamma$  CD8 T cell responses by ICS.**

Total antigen-specific IFN $\gamma$  responses in CD8 T cells following stimulation with Spike peptide pools are presented for one-dose (Panel A) and two-dose (Panel B) cohorts. Horizontal bar displays mean per group with error bars depicting the standard deviation (SD). Each dot represents an individual participant. Younger adults 21-55 years; older adults 56-80 years.

No notable differences between ARCT-021 and placebo for IL-2 and TNF-alpha responses and data therefore not shown.
